# Supplementary material
Source: PubMed Central journal article supplement (PMC9450335)
Supplement: 12903_2022_2386_MOESM1_ESM.pdf [file 12903_2022_2386_MOESM1_ESM.pdf]

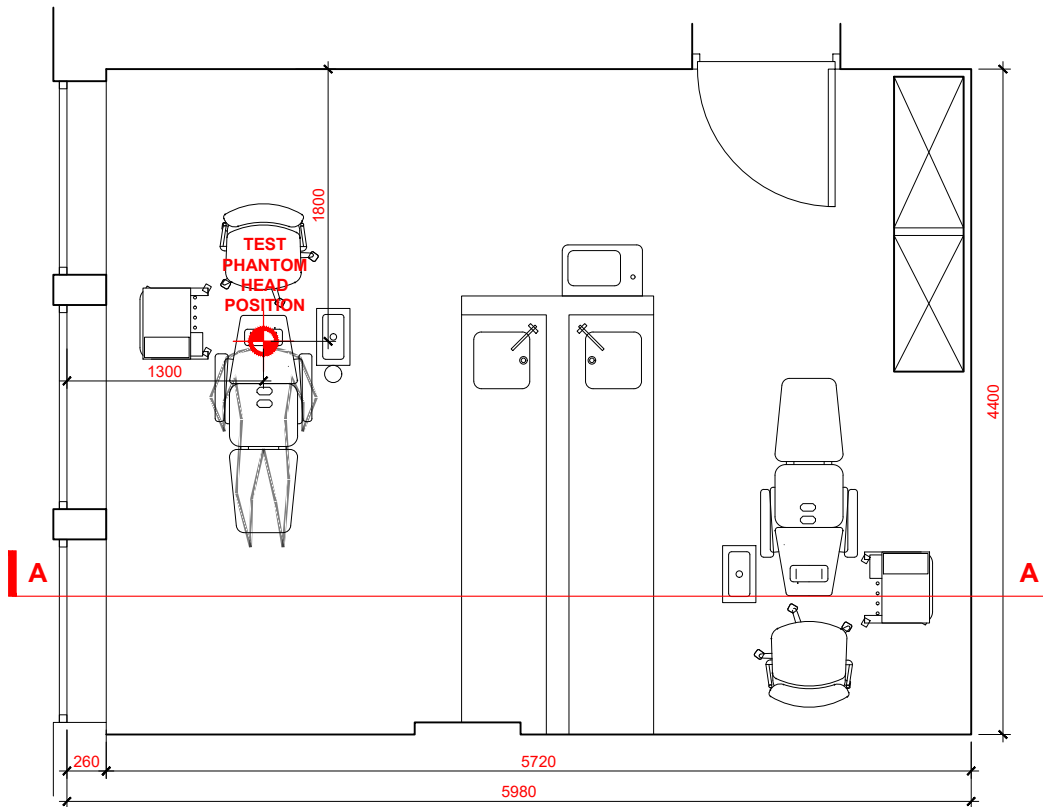

**PLAN VIEW**

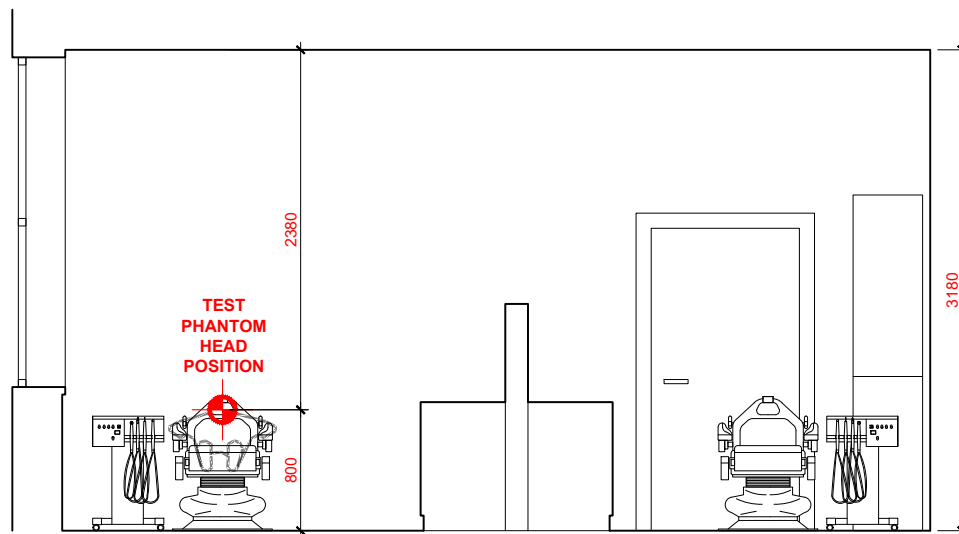

**SECTION A-A**

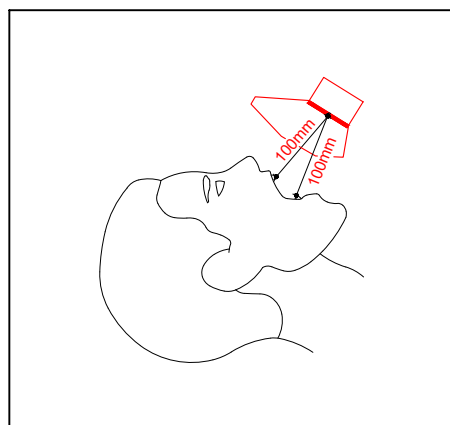

**SINGLE SENSOR SETUP**

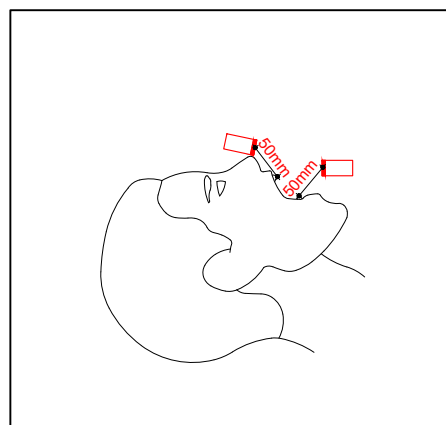

**DUAL SENSOR SETUP**
